# Supplementary material for: Dissipation and Dietary Risk Assessment of Pydiflumetofen Residues in Soybean
Source: MDPI journal article supplement (doi:10.3390/molecules27238465), 2022-12-02
Supplement: s1 [file s1]

*Supplementary materials for*

## **Dissipation and Dietary Risk Assessment of Pydiflumetofen Residues in Soybean**

**Liping Wei<sup>1</sup>, Xingang Hou<sup>2</sup>, Zhiguang Hou<sup>1,\*</sup>, Xiaolong Yu<sup>1</sup>, Xiumei Wang<sup>1</sup>, Qinghui Zhao<sup>1</sup>, Hemin Gao<sup>1</sup>, Hanju Liu<sup>1</sup>, Xiaodong Zheng<sup>1</sup>, and Zhongbin Lu<sup>1</sup>,**

1 College of soy Protection, Jilin Agricultural University, Changchun 130118, China

2 College of Science, China Agricultural University, Beijing 100193, China

\* Corresponding author: E-mail: zhiguangh@jlu.edu.cn; Tel: +86 (431) 84510942; Fax: +86 (431) 84510942.

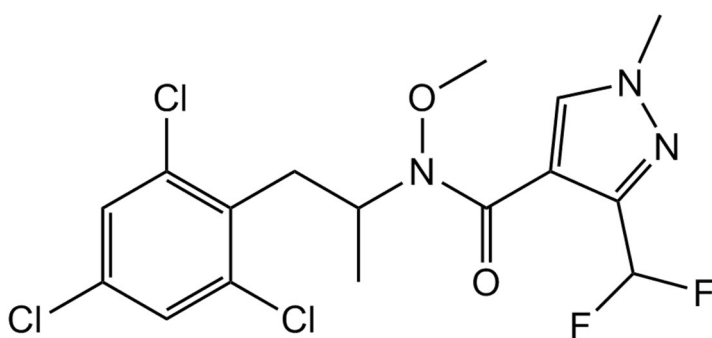

**Figure S1.** Chemical structure of pydiflumetofen

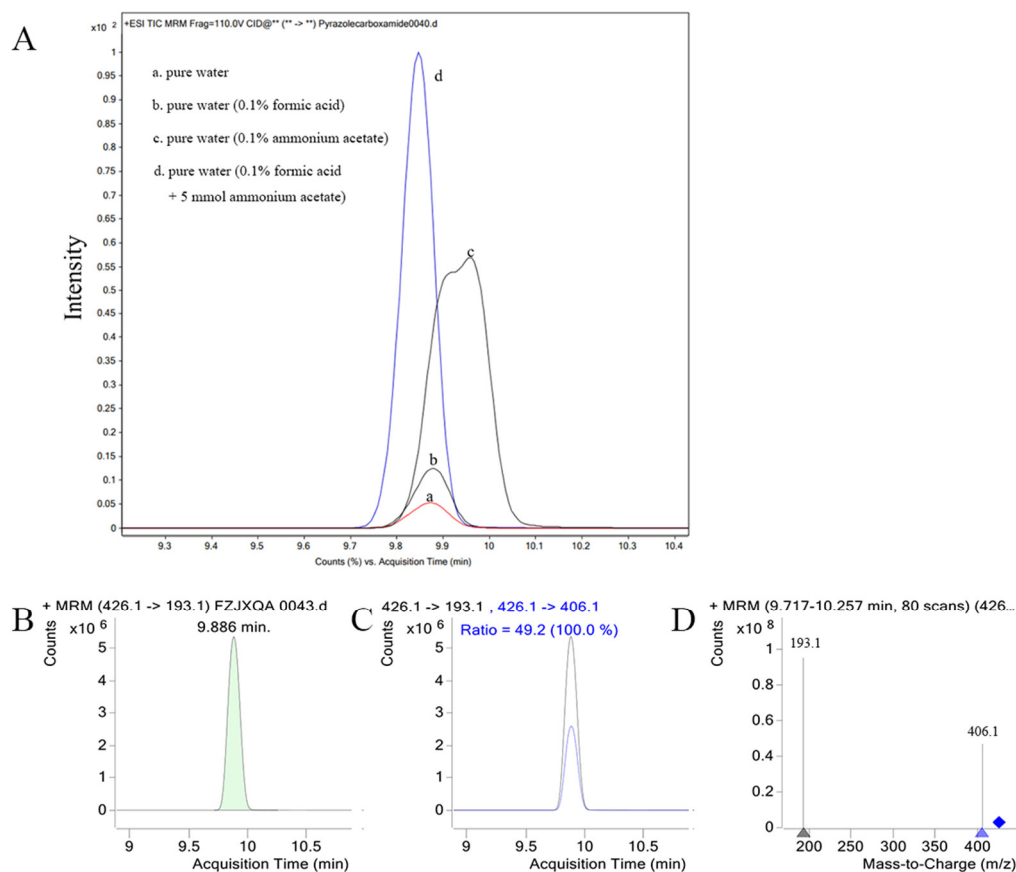

**Figure S2.** 1.0 mg/L chromatograms of pydiflumetofen. (A) The TIC chromatogram in different mobile phases; (B) Quantitative ion MRM chromatograms of pydiflumetofen; (C) Qualitative ion MRM chromatogram of pydiflumetofen; (D) Spectrum of two product ions with  $m/z$  of 193.1 and 406.1

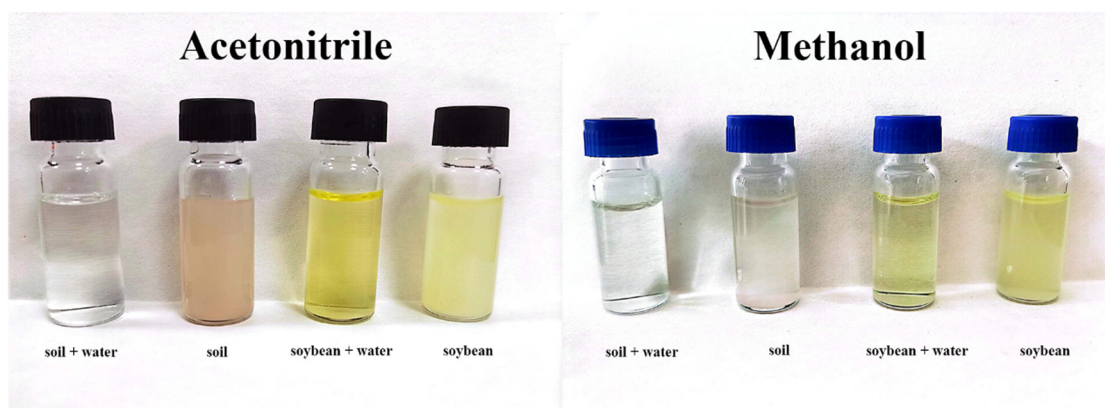

**Figure S3.** Extraction of soybean and soil compared with and without the addition of water in acetonitrile and methanol

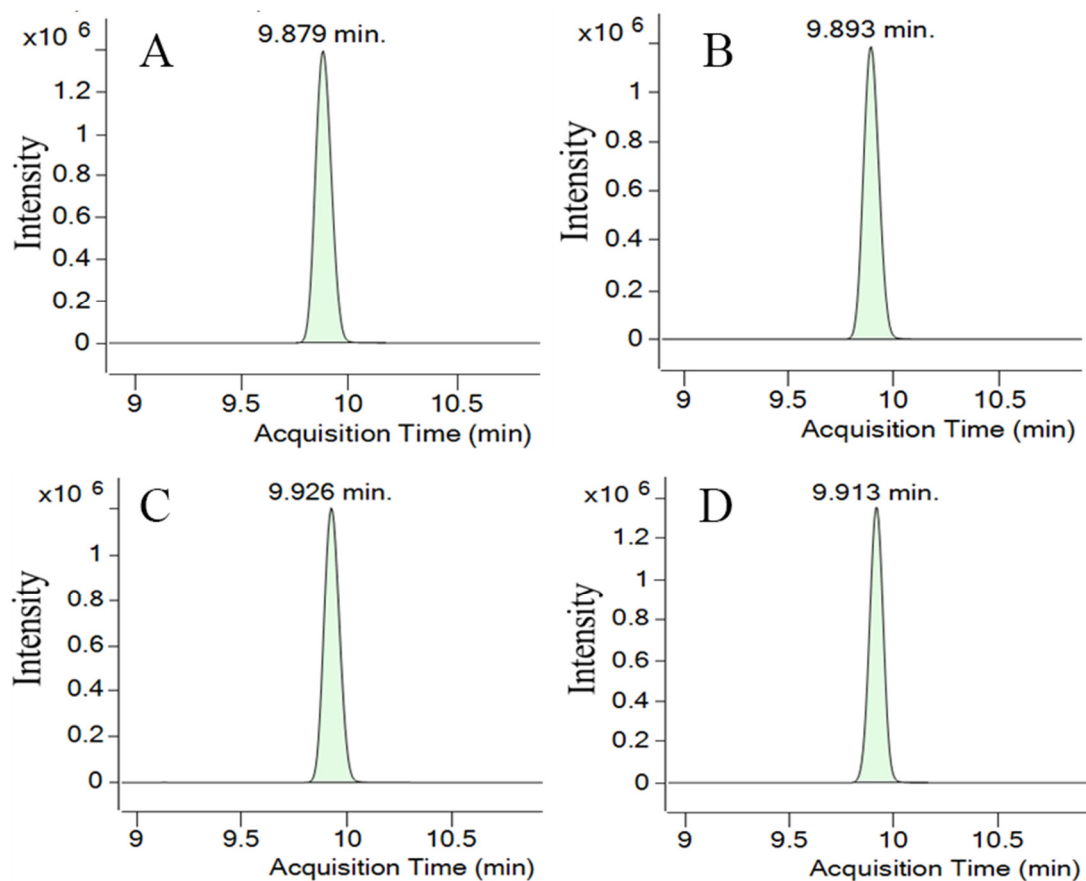

**Figure S4.** MRM Chromatogram of pydiflumetofen at 0.01 mg/kg based on the quantitative ion. (A) Pydiflumetofen dissolved in acetonitrile; (B) Pydiflumetofen dissolved in plant matrix; (C) Pydiflumetofen dissolved in soybean matrix; (D) Pydiflumetofen dissolved in soil matrix.

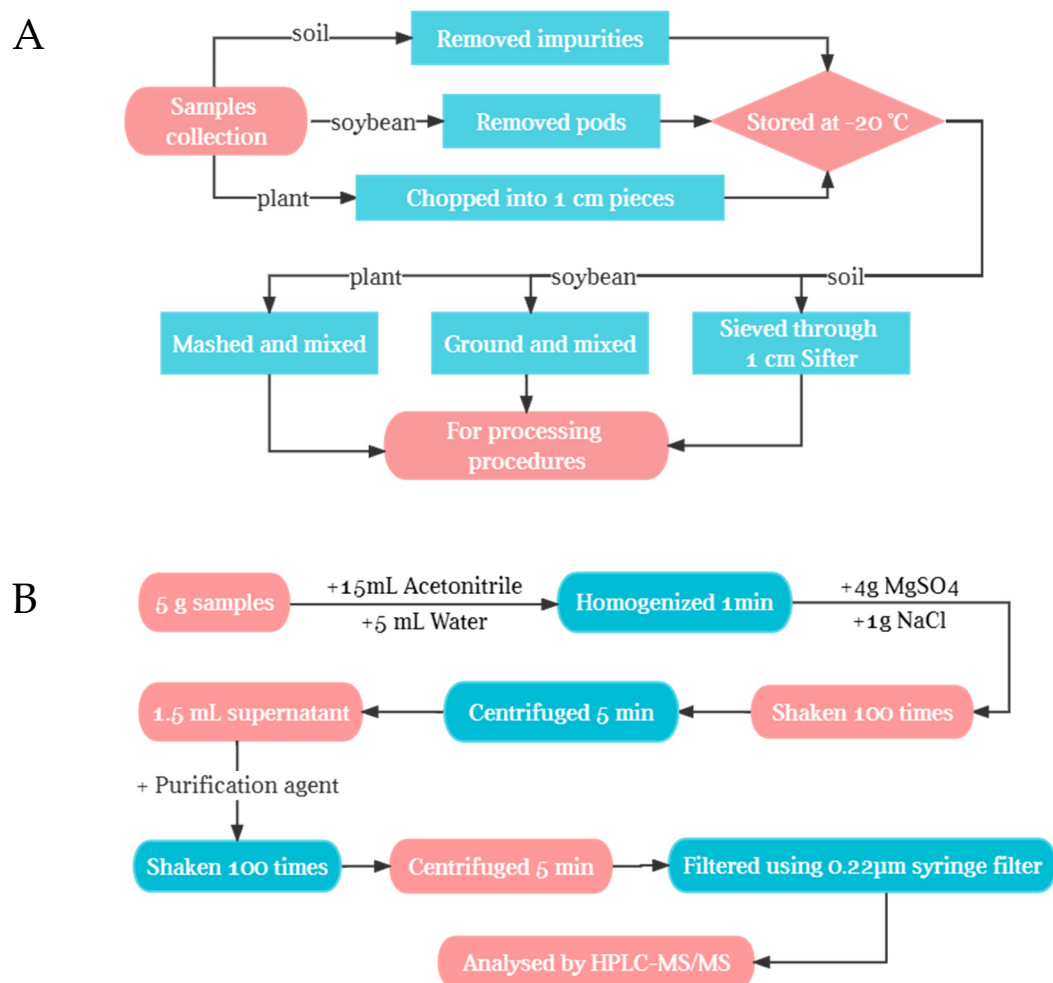

**Figure S5.** Samples preparation process. (A) Collection and preparation; (B) Extraction and purification.

**Table S1.** Calibration equation, correlation coefficients (r) and matrix effects of pydiflumetofen in soybean plant, soybean and soil matrices

| Matrices      | Range (mg/kg) | Matrix effects (%) | Calibration equation          | r      |
|---------------|---------------|--------------------|-------------------------------|--------|
| Soybean plant | 0.001~0.5     | 94.2               | $y=57,897,625.74x+317,536.33$ | 0.9989 |
| Soybean       | 0.001~0.5     | 68.7               | $y=26,725,890.67x+43,653.01$  | 0.9999 |
| Soil          | 0.001~0.5     | 91.5               | $y=35,576,480.23x+265,585.33$ | 0.9992 |

**Table S2.** Soil properties and climatic conditions at the experiment location in China

| Location  | Soil classification | Organic matter (%) | pH  | Mean Sunshine (h) | Total rainfall (Jun–Oct, mm) | Mean temperature (°C) |
|-----------|---------------------|--------------------|-----|-------------------|------------------------------|-----------------------|
| Changchun | Meadow soil         | 2.6                | 6.9 | 2827.0            | 1408                         | 18.7                  |
| Chifeng   | Phaeozems           | 1.7                | 8.4 | 2681.8            | 501                          | 18.1                  |
| Hailun    | Phaeozems           | 4.6                | 5.3 | 2543.2            | 1129                         | 16.6                  |

**Table S3.** Terminal residues of pydiflumetofen in soybean with different application dosages and different application times (n = 3)

| Dosage<br>(g a.i./ha) | Times | PHI <sup>a</sup> | Residues data (n = 3) (Mean value, mg/kg) |         |        |
|-----------------------|-------|------------------|-------------------------------------------|---------|--------|
|                       |       |                  | Changchun                                 | Chifeng | Hailun |
| 150                   | 3     | 21               | <0.010                                    | 0.046   | <0.010 |
|                       |       | 28               | <0.010                                    | 0.034   | <0.010 |
|                       |       | 35               | <0.010                                    | 0.017   | <0.010 |
| 150                   | 4     | 21               | <0.010                                    | 0.027   | <0.010 |
|                       |       | 28               | <0.010                                    | 0.010   | <0.010 |
|                       |       | 35               | <0.010                                    | 0.021   | <0.010 |
| 225                   | 3     | 21               | <0.010                                    | 0.038   | <0.010 |
|                       |       | 28               | <0.010                                    | 0.014   | <0.010 |
|                       |       | 35               | <0.010                                    | 0.015   | <0.010 |
| 225                   | 4     | 21               | <0.010                                    | 0.043   | <0.010 |
|                       |       | 28               | <0.010                                    | 0.015   | <0.010 |
|                       |       | 35               | <0.010                                    | 0.024   | <0.010 |

Note: <sup>a</sup> PHI, Pre-harvest interval

**Table S4.** MRLs adopted by other countries or organisms for pydiflumetofen in crops/products for which it is registered in China

| Food<br>classification              | China | CAC <sup>a</sup> | USA | EU | South<br>Korea | Japan | Australia | Canada |
|-------------------------------------|-------|------------------|-----|----|----------------|-------|-----------|--------|
| Wheat cereals and<br>wheat products |       | 0.4              | 0.3 |    | 0.3            | 0.6   |           |        |
| Potatoes                            |       | 0.5              |     |    | 0.015          | 0.02  |           |        |
| Dried beans and<br>their products   |       | 0.4              | 0.4 |    | 0.4            | 0.4   | 0.5*      | 0.1    |
| Dark-colored<br>vegetables          |       | 15               | 50  |    | 40             | 40    | 30*       | 50     |
| Light-colored<br>vegetables         |       | 15               | 50  |    | 30             | 40    | 30*       | 50     |
| Fruits                              |       | 4                | 5   |    | 5              | 2     | 5*        | 5      |
| Oilseeds and oil                    |       | 0.9              | 0.9 |    | 0.9            | 0.9   | 0.07*     | 30     |

Note: <sup>a</sup> CAC: Codex Alimentarius Commission
